# Supplementary material
Source: publisher figshare collection journal article supplement (https://acs.figshare.com/ndownloader/files/4149607)
Supplement: Supplementary file 1 [file 4149607]

**Table S1.**  $^1\text{H}$  NMR spectroscopy-based collagen and GAG determination in bovine cartilage as a function of the applied bovine nasal cartilage weight.

| metabolite                    | initial weight<br>bovine<br>cartilage<br>[mg/ml] | $^1\text{H}$ NMR based<br>metabolite<br>weight<br>[mg/ml] | mass<br>ratio<br>[1 10 <sup>-3</sup> ] | average<br>mass<br>ratio<br>[1 10 <sup>-3</sup> ] | deviation from<br>average mass<br>ratio [%] |
|-------------------------------|--------------------------------------------------|-----------------------------------------------------------|----------------------------------------|---------------------------------------------------|---------------------------------------------|
| alanine                       | 200                                              | 1.837                                                     | 9.2                                    | 9.3                                               | -0.7                                        |
|                               | 150                                              | 1.449                                                     | 9.7                                    |                                                   | 4.5                                         |
|                               | 100                                              | 0.890                                                     | 8.9                                    |                                                   | -3.8                                        |
| glycine                       | 200                                              | 4.535                                                     | 22.7                                   | 23.3                                              | -2.8                                        |
|                               | 150                                              | 3.637                                                     | 24.2                                   |                                                   | 3.9                                         |
|                               | 100                                              | 2.307                                                     | 23.1                                   |                                                   | -1.1                                        |
| hydroxyl-<br>proline          | 200                                              | 2.007                                                     | 10.0                                   | 10.0                                              | 0.1                                         |
|                               | 150                                              | 1.557                                                     | 10.4                                   |                                                   | 3.6                                         |
|                               | 100                                              | 0.965                                                     | 9.7                                    |                                                   | -3.7                                        |
| proline                       | 200                                              | 2.350                                                     | 11.7                                   | 12.2                                              | -3.3                                        |
|                               | 150                                              | 1.953                                                     | 13.0                                   |                                                   | 7.1                                         |
|                               | 100                                              | 1.169                                                     | 11.7                                   |                                                   | -3.8                                        |
| $\alpha$ -D-<br>galactosamine | 200                                              | 0.914                                                     | 4.6                                    | 4.6                                               | -0.4                                        |
|                               | 150                                              | 0.790                                                     | 5.3                                    |                                                   | 14.7                                        |
|                               | 100                                              | 0.393                                                     | 3.9                                    |                                                   | -14.3                                       |
| $\beta$ -D-<br>galactosamine  | 200                                              | 0.616                                                     | 3.1                                    | 2.8                                               | 10.4                                        |
|                               | 150                                              | 0.425                                                     | 2.8                                    |                                                   | 1.6                                         |
|                               | 100                                              | 0.246                                                     | 2.5                                    |                                                   | -12.0                                       |
| $\alpha$ -D-<br>glucosamine   | 200                                              | 0.094                                                     | 0.5                                    | 0.4                                               | 6.4                                         |
|                               | 150                                              | 0.073                                                     | 0.5                                    |                                                   | 10.1                                        |
|                               | 100                                              | 0.037                                                     | 0.4                                    |                                                   | -16.5                                       |
| $\beta$ -D-<br>glucosamine    | 200                                              | 0.039                                                     | 0.2                                    | 0.2                                               | -14.5                                       |
|                               | 150                                              | 0.038                                                     | 0.3                                    |                                                   | 11.5                                        |

|  |     |       |     |  |     |
|--|-----|-------|-----|--|-----|
|  | 100 | 0.024 | 0.2 |  | 3.0 |
|--|-----|-------|-----|--|-----|

A defined amount of cartilage was subjected to hydrolysis by DCl. After 10 days incubation, TSP of defined concentration was added as concentration standard. It can be seen that irrespective of the initial weight of the cartilage, the content of the quantified amino acids Ala, Gly, Hyp and Pro deviates, with one exception, within a five percent range only. For further details see Materials and Methods section.

**Table S2.** Amino acid determination of hydrolyzed horse tendon by  $^1\text{H}$  NMR spectroscopy as measure of the collagen content.

| monomer          | initial weight<br>horse tendon<br>[mg/ml] | $^1\text{H}$ NMR based<br>monomer weight<br>[mg/ml] | mass<br>ratio<br>[ $10^{-3}$ ] | ratio to<br>bovine<br>cartilage |
|------------------|-------------------------------------------|-----------------------------------------------------|--------------------------------|---------------------------------|
| alanine          | 200                                       | 8.05                                                | 40.0                           | 4.4                             |
| glycine          | 200                                       | 19.30                                               | 97.0                           | 4.1                             |
| hydroxyl-proline | 200                                       | 9.88                                                | 49.0                           | 4.9                             |
| proline          | 200                                       | 10.08                                               | 50.0                           | 4.1                             |

In the last column, the determined contents are compared with the collagen content of bovine cartilage (cf. Tab. S1).
